# Supplementary material for: Brentuximab vedotin after autologous transplantation in pediatric patients with relapsed/refractory Hodgkin lymphoma
Source: PubMed Central journal article supplement — Blood Adv. 2023 Mar 15;7(13):3225–31. doi: 10.1182/bloodadvances.2022009323 (PMC10338202; doi:10.1182/bloodadvances.2022009323), 2023-03-15
Supplement: BLOODA_ADV-2022-009323-mmc1.pdf [file BLOODA_ADV-2022-009323-mmc1.pdf]

# Supplemental Figure 1: Progression-Free Survival By Number of Risk Factors

**A**

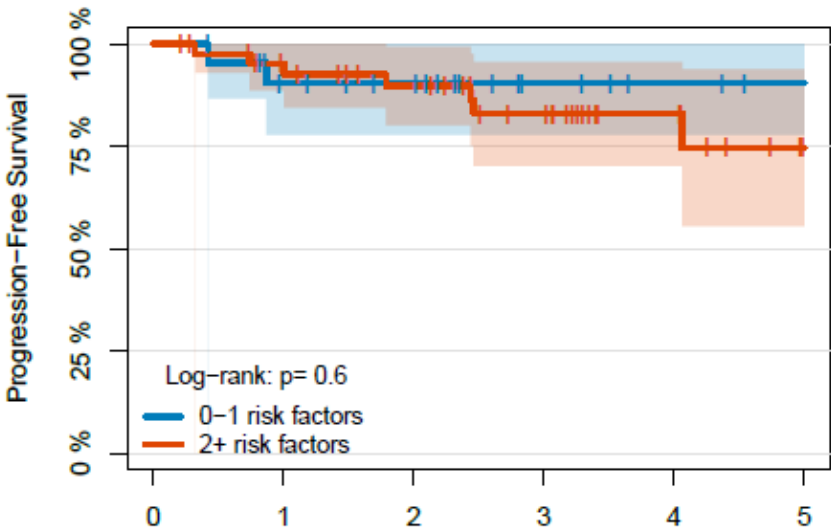

| At-risk           | Time from transplant (years) |    |    |    |    |   |
|-------------------|------------------------------|----|----|----|----|---|
|                   | 0                            | 1  | 2  | 3  | 4  | 5 |
| 0-1 risk factors: | 23                           | 17 | 14 | 6  | 3  | 1 |
| 2+ risk factors:  | 44                           | 37 | 31 | 22 | 12 | 4 |

|                         | 1 year PFS      | 3 year PFS      | 5 year PFS      |
|-------------------------|-----------------|-----------------|-----------------|
| <b>0-1 risk factors</b> | 90% (78%, 100%) | 90% (78%, 100%) | 90% (78%, 100%) |
| <b>≥2 risk factors</b>  | 95% (89%, 100%) | 83% (70%, 96%)  | 75% (55%, 94%)  |

**B**

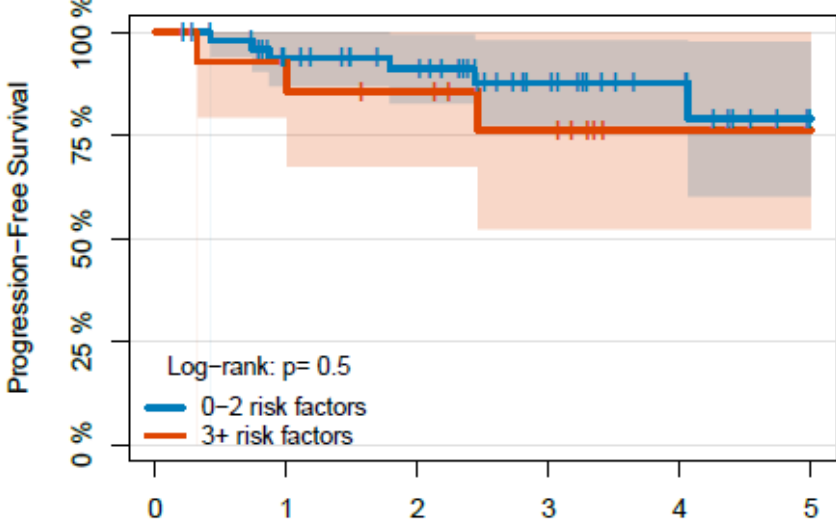

| At-risk           | Time from transplant (years) |    |    |    |    |   |
|-------------------|------------------------------|----|----|----|----|---|
|                   | 0                            | 1  | 2  | 3  | 4  | 5 |
| 0-2 risk factors: | 53                           | 41 | 34 | 20 | 12 | 2 |
| 3+ risk factors:  | 14                           | 13 | 11 | 8  | 3  | 3 |

|                         | 1 year PFS      | 3 year PFS      | 5 year PFS      |
|-------------------------|-----------------|-----------------|-----------------|
| <b>0-2 risk factors</b> | 94% (87%, 100%) | 88% (77%, 98%)  | 79% (60%, 98%)  |
| <b>≥3 risk factors</b>  | 93% (79%, 100%) | 76% (52%, 100%) | 76% (52%, 100%) |

A: Progression-free survival in patients with 0-1 risk factors and patients with ≥ 2 risk factors; B: Progression-free survival in patients with 0-2 risk factors and patients with ≥ 3 risk factors; PFS includes 95% confidence interval

**Supplemental Table 1: Relapse Characteristics According to Initial Chemotherapy**

| <b>Characteristic</b>                     | <b>ABVE-PC (n=37)</b>  | <b>ABVD (n=12)</b> | <b>OEPA-COPDAC (n=8)</b> | <b>Other (n=10)</b> |
|-------------------------------------------|------------------------|--------------------|--------------------------|---------------------|
| Relapsed                                  | 29 (78%)               | 5 (42%)            | 2 (25%)                  | 7 (70%)             |
| Refractory                                | 8 (22%)                | 7 (58%)            | 6 (75%)                  | 3 (30%)             |
| Time to initial relapse in months [range] | 11 [2-55] <sup>1</sup> | 12 [5-28]          | 8 [5-11]                 | 12 [7-137]          |

<sup>1</sup>Time to relapse unknown in one patient
